# Supplementary material
Source: Springer Nature journal article supplement (https://www.springermedizin.de/resource/supplementary/12889_2011_3801_MOESM2_ESM.pdf/9491886)

# Age stratified prevalence of metabolic syndrome components

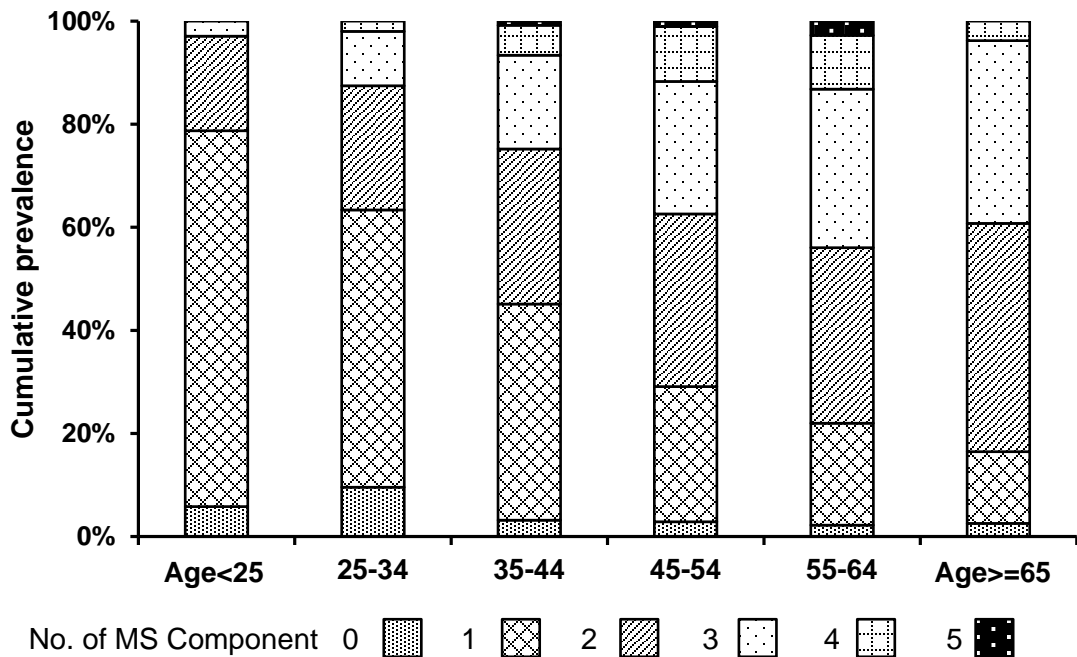

Supplement: MOESM2 [file 9491886]
